# Supplementary material for: Salinity reduction benefits European eel larvae: Insights at the morphological and molecular level
Source: PLoS One. 2018 Jun 13;13(6):e0198294. doi: 10.1371/journal.pone.0198294 (PMC5999099; doi:10.1371/journal.pone.0198294)
Supplement: S1 File — (XLSX) [file pone.0198294.s001.xlsx]

## Sheet: experimental set-up
treatment					sampling		sampling		sampling		sampling		sampling		sampling		sampling
ID	reduction		rep	Hatching	0	1	2	3	4	5	6	7	8	9	10	11	12
con	no		1	36	36	36	36	36	36	36	36	36	36	36	36	36	36
			2	36	36	36	36	36	36	36	36	36	36	36	36	36	36
			3	36	36	36	36	36	36	36	36	36	36	36	36	36	36
o1	day0	1 psu/day	1	36	36	36	36	35	34	33	32	31	30	29	28	27	26
			2	36	36	36	36	35	34	33	32	31	30	29	28	27	26
			3	36	36	36	36	35	34	33	32	31	30	29	28	27	26
o2		2 psu/day	1	36	36	36	36	34	32	30	28	26	24	22	20	18	16
			2	36	36	36	36	34	32	30	28	26	24	22	20	18	16
			3	36	36	36	36	34	32	30	28	26	24	22	20	18	16
o4		4 psu/day	1	36	36	36	36	32	28	24	20	16	16	16	16	16	16
			2	36	36	36	36	32	28	24	20	16	16	16	16	16	16
			3	36	36	36	36	32	28	24	20	16	16	16	16	16	16
31	day3	1 psu/day	1	36	35	34	33	32	31	30	29	28	27	26	25	24	23
			2	36	35	34	33	32	31	30	29	28	27	26	25	24	23
			3	36	35	34	33	32	31	30	29	28	27	26	25	24	23
32		2 psu/day	1	36	34	32	30	28	26	24	22	20	18	16	16	16	16
			2	36	34	32	30	28	26	24	22	20	18	16	16	16	16
			3	36	34	32	30	28	26	24	22	20	18	16	16	16	16
34		4 psu/day	1	36	32	28	24	20	16	16	16	16	16	16	16	16	16
			2	36	32	28	24	20	16	16	16	16	16	16	16	16	16
			3	36	32	28	24	20	16	16	16	16	16	16	16	16	16

## Sheet: mortality 
Family	Age	Rep	Treat	%mortality
1	2	1	o1	0.697906
1	2	2	o1	0.403633
1	2	3	o1	0.742312
1	3	1	o1	1.09671
1	3	2	o1	0.908174
1	3	3	o1	1.16649
1	4	1	o1	3.58923
1	4	2	o1	2.82543
1	4	3	o1	3.28738
1	5	1	o1	4.28714
1	5	2	o1	4.23814
1	5	3	o1	4.98409
1	6	1	o1	5.58325
1	6	2	o1	4.9445
1	6	3	o1	6.04454
1	7	1	o1	6.77966
1	7	2	o1	5.44904
1	7	3	o1	6.57476
1	8	1	o1	7.27817
1	8	2	o1	5.75177
1	8	3	o1	7.21103
1	9	1	o1	7.97607
1	9	2	o1	6.1554
1	9	3	o1	8.16543
1	10	1	o1	7.97607
1	10	2	o1	6.55903
1	10	3	o1	8.48356
1	11	1	o1	8.07577
1	11	2	o1	6.65994
1	11	3	o1	8.48356
1	12	1	o1	8.47458
1	12	2	o1	6.86176
1	12	3	o1	8.8017
2	2	1	o1	15.7685
2	2	2	o1	8.52391
2	2	3	o1	9.20245
2	3	1	o1	17.7645
2	3	2	o1	12.6819
2	3	3	o1	14.1104
2	4	1	o1	20.5589
2	4	2	o1	16.2162
2	4	3	o1	17.4847
2	5	1	o1	23.5529
2	5	2	o1	18.711
2	5	3	o1	20.2454
2	6	1	o1	27.3453
2	6	2	o1	20.5821
2	6	3	o1	20.8589
2	7	1	o1	30.9381
2	7	2	o1	24.948
2	7	3	o1	24.5399
2	8	1	o1	34.7305
2	8	2	o1	29.106
2	8	3	o1	26.3804
2	9	1	o1	39.7206
2	9	2	o1	34.5114
2	9	3	o1	31.5951
2	10	1	o1	44.511
2	10	2	o1	37.0062
2	10	3	o1	34.3558
2	11	1	o1	47.9042
2	11	2	o1	40.7484
2	11	3	o1	36.1963
2	12	1	o1	48.9022
2	12	2	o1	41.3721
2	12	3	o1	36.5031
3	2	1	o1	1.00143
3	2	2	o1	1.002
3	2	3	o1	0.452489
3	3	1	o1	2.28898
3	3	2	o1	1.50301
3	3	3	o1	1.44796
3	4	1	o1	3.29041
3	4	2	o1	2.00401
3	4	3	o1	2.35294
3	5	1	o1	4.14878
3	5	2	o1	2.70541
3	5	3	o1	3.07692
3	6	1	o1	4.57797
3	6	2	o1	2.90581
3	6	3	o1	3.8009
3	7	1	o1	6.29471
3	7	2	o1	4.50902
3	7	3	o1	4.61538
3	8	1	o1	8.29757
3	8	2	o1	6.41283
3	8	3	o1	6.60633
3	9	1	o1	9.44206
3	9	2	o1	8.21643
3	9	3	o1	8.41629
3	10	1	o1	10.0143
3	10	2	o1	8.91784
3	10	3	o1	9.23077
3	11	1	o1	12.0172
3	11	2	o1	9.91984
3	11	3	o1	9.86425
3	12	1	o1	13.0186
3	12	2	o1	10.521
3	12	3	o1	10.4072
1	2	1	o2	0.645995
1	2	2	o2	0.45045
1	2	3	o2	0.932836
1	3	1	o2	1.42119
1	3	2	o2	1.12613
1	3	3	o2	1.6791
1	4	1	o2	2.19638
1	4	2	o2	2.81532
1	4	3	o2	3.73134
1	5	1	o2	3.48837
1	5	2	o2	3.49099
1	5	3	o2	4.5709
1	6	1	o2	4.26357
1	6	2	o2	4.27928
1	6	3	o2	5.03731
1	7	1	o2	4.78036
1	7	2	o2	4.5045
1	7	3	o2	5.1306
1	8	1	o2	5.03876
1	8	2	o2	4.61712
1	8	3	o2	5.31716
1	9	1	o2	5.16796
1	9	2	o2	5.18018
1	9	3	o2	5.41045
1	10	1	o2	5.16796
1	10	2	o2	5.18018
1	10	3	o2	5.50373
1	11	1	o2	5.16796
1	11	2	o2	5.18018
1	11	3	o2	5.50373
1	12	1	o2	5.42636
1	12	2	o2	5.29279
1	12	3	o2	5.50373
2	2	1	o2	14.7392
2	2	2	o2	11.7117
2	2	3	o2	8.34813
2	3	1	o2	18.3673
2	3	2	o2	16.6667
2	3	3	o2	14.032
2	4	1	o2	20.6349
2	4	2	o2	19.3694
2	4	3	o2	17.9396
2	5	1	o2	23.356
2	5	2	o2	21.6216
2	5	3	o2	19.5382
2	6	1	o2	25.1701
2	6	2	o2	22.7477
2	6	3	o2	20.7815
2	7	1	o2	26.3039
2	7	2	o2	23.4234
2	7	3	o2	21.8472
2	8	1	o2	27.4376
2	8	2	o2	25
2	8	3	o2	22.913
2	9	1	o2	28.3447
2	9	2	o2	25.6757
2	9	3	o2	23.6234
2	10	1	o2	29.2517
2	10	2	o2	26.5766
2	10	3	o2	24.1563
2	11	1	o2	29.932
2	11	2	o2	27.9279
2	11	3	o2	25.5773
2	12	1	o2	30.6122
2	12	2	o2	28.6036
2	12	3	o2	25.9325
3	2	1	o2	0.897308
3	2	2	o2	1.78082
3	2	3	o2	0.895037
3	3	1	o2	1.79462
3	3	2	o2	2.53425
3	3	3	o2	1.79007
3	4	1	o2	2.79163
3	4	2	o2	3.21918
3	4	3	o2	2.92921
3	5	1	o2	3.38983
3	5	2	o2	3.42466
3	5	3	o2	3.82425
3	6	1	o2	4.38684
3	6	2	o2	4.31507
3	6	3	o2	4.80065
3	7	1	o2	5.78265
3	7	2	o2	4.93151
3	7	3	o2	6.34662
3	8	1	o2	6.58026
3	8	2	o2	5.54795
3	8	3	o2	7.72986
3	9	1	o2	7.67697
3	9	2	o2	5.89041
3	9	3	o2	8.6249
3	10	1	o2	8.47458
3	10	2	o2	6.30137
3	10	3	o2	9.1131
3	11	1	o2	8.77368
3	11	2	o2	6.57534
3	11	3	o2	9.27583
3	12	1	o2	9.07278
3	12	2	o2	6.71233
3	12	3	o2	9.27583
1	2	1	o4	0.380518
1	2	2	o4	0.66335
1	2	3	o4	1.93878
1	3	1	o4	0.608828
1	3	2	o4	0.995025
1	3	3	o4	2.2449
1	4	1	o4	1.90259
1	4	2	o4	2.07297
1	4	3	o4	5
1	5	1	o4	2.66362
1	5	2	o4	2.73632
1	5	3	o4	5.71429
1	6	1	o4	3.65297
1	6	2	o4	3.31675
1	6	3	o4	6.02041
1	7	1	o4	3.95738
1	7	2	o4	3.48259
1	7	3	o4	6.42857
1	8	1	o4	4.2618
1	8	2	o4	3.56551
1	8	3	o4	6.63265
1	9	1	o4	4.56621
1	9	2	o4	3.73134
1	9	3	o4	6.63265
1	10	1	o4	4.71842
1	10	2	o4	3.73134
1	10	3	o4	6.63265
1	11	1	o4	4.79452
1	11	2	o4	3.73134
1	11	3	o4	6.73469
1	12	1	o4	4.87062
1	12	2	o4	3.73134
1	12	3	o4	6.73469
2	2	1	o4	13.7387
2	2	2	o4	13.1329
2	2	3	o4	13.5307
2	3	1	o4	16.4414
2	3	2	o4	18.1962
2	3	3	o4	18.3932
2	4	1	o4	18.4685
2	4	2	o4	20.2532
2	4	3	o4	20.0846
2	5	1	o4	20.045
2	5	2	o4	20.8861
2	5	3	o4	20.7188
2	6	1	o4	20.9459
2	6	2	o4	21.0443
2	6	3	o4	21.1416
2	7	1	o4	21.1712
2	7	2	o4	21.3608
2	7	3	o4	21.5645
2	8	1	o4	21.6216
2	8	2	o4	21.3608
2	8	3	o4	21.5645
2	9	1	o4	21.6216
2	9	2	o4	21.3608
2	9	3	o4	21.5645
2	10	1	o4	22.2973
2	10	2	o4	21.9937
2	10	3	o4	21.7759
2	11	1	o4	22.973
2	11	2	o4	22.3101
2	11	3	o4	22.4101
2	12	1	o4	23.4234
2	12	2	o4	22.4684
2	12	3	o4	22.4101
3	2	1	o4	1.07362
3	2	2	o4	1.4936
3	2	3	o4	1.08055
3	3	1	o4	3.45092
3	3	2	o4	4.62304
3	3	3	o4	4.71513
3	4	1	o4	4.29448
3	4	2	o4	5.47653
3	4	3	o4	6.97446
3	5	1	o4	4.98466
3	5	2	o4	5.76102
3	5	3	o4	7.26916
3	6	1	o4	5.59816
3	6	2	o4	6.75676
3	6	3	o4	8.05501
3	7	1	o4	6.05828
3	7	2	o4	7.25462
3	7	3	o4	8.74263
3	8	1	o4	6.5184
3	8	2	o4	7.68137
3	8	3	o4	9.33202
3	9	1	o4	6.67178
3	9	2	o4	7.82361
3	9	3	o4	9.33202
3	10	1	o4	6.82515
3	10	2	o4	8.10811
3	10	3	o4	9.62672
3	11	1	o4	6.82515
3	11	2	o4	8.10811
3	11	3	o4	9.62672
3	12	1	o4	6.82515
3	12	2	o4	8.10811
3	12	3	o4	9.62672
1	2	1	31	0.383509
1	2	2	31	1.09689
1	2	3	31	1.45414
1	3	1	31	1.82167
1	3	2	31	2.83364
1	3	3	31	2.23714
1	4	1	31	4.12272
1	4	2	31	4.47898
1	4	3	31	5.81655
1	5	1	31	4.88974
1	5	2	31	5.75868
1	5	3	31	7.04698
1	6	1	31	6.13615
1	6	2	31	7.1298
1	6	3	31	8.72483
1	7	1	31	7.09492
1	7	2	31	8.04388
1	7	3	31	9.73154
1	8	1	31	7.76606
1	8	2	31	9.41499
1	8	3	31	10.4027
1	9	1	31	8.05369
1	9	2	31	10.0548
1	9	3	31	10.7383
1	10	1	31	8.24545
1	10	2	31	10.4205
1	10	3	31	11.0738
1	11	1	31	8.34132
1	11	2	31	10.6947
1	11	3	31	11.4094
1	12	1	31	8.4372
1	12	2	31	10.9689
1	12	3	31	11.5213
2	2	1	31	11.5987
2	2	2	31	9.09091
2	2	3	31	9.93377
2	3	1	31	19.1223
2	3	2	31	16.5404
2	3	3	31	16.3907
2	4	1	31	21.4734
2	4	2	31	18.0556
2	4	3	31	19.8675
2	5	1	31	25.5486
2	5	2	31	22.2222
2	5	3	31	24.6689
2	6	1	31	29.3103
2	6	2	31	26.6414
2	6	3	31	29.8013
2	7	1	31	37.1473
2	7	2	31	33.4596
2	7	3	31	33.7748
2	8	1	31	44.2006
2	8	2	31	37.2475
2	8	3	31	40.2318
2	9	1	31	52.0376
2	9	2	31	47.3485
2	9	3	31	46.0265
2	10	1	31	55.3292
2	10	2	31	51.5152
2	10	3	31	50.9934
2	11	1	31	58.7774
2	11	2	31	56.0606
2	11	3	31	53.1457
2	12	1	31	59.7179
2	12	2	31	57.0707
2	12	3	31	53.8079
3	2	1	31	0.719895
3	2	2	31	0.618921
3	2	3	31	0.337553
3	3	1	31	2.48691
3	3	2	31	1.67993
3	3	3	31	1.94093
3	4	1	31	3.14136
3	4	2	31	2.21043
3	4	3	31	3.12236
3	5	1	31	4.71204
3	5	2	31	3.53669
3	5	3	31	5.56962
3	6	1	31	5.82461
3	6	2	31	4.42087
3	6	3	31	6.58228
3	7	1	31	7.91885
3	7	2	31	5.65871
3	7	3	31	8.10127
3	8	1	31	9.62042
3	8	2	31	7.51547
3	8	3	31	10.9705
3	9	1	31	11.6492
3	9	2	31	10.0796
3	9	3	31	12.9114
3	10	1	31	12.6963
3	10	2	31	11.4058
3	10	3	31	13.9241
3	11	1	31	13.5471
3	11	2	31	13.7047
3	11	3	31	16.2869
3	12	1	31	14.267
3	12	2	31	14.412
3	12	3	31	17.0464
1	2	1	32	0.691017
1	2	2	32	1.28088
1	2	3	32	1.11449
1	3	1	32	2.27048
1	3	2	32	2.56176
1	3	3	32	2.43161
1	4	1	32	5.03455
1	4	2	32	5.03202
1	4	3	32	5.67376
1	5	1	32	6.81145
1	5	2	32	6.58737
1	5	3	32	8.71327
1	6	1	32	7.30503
1	6	2	32	7.50229
1	6	3	32	9.62513
1	7	1	32	7.60118
1	7	2	32	8.05124
1	7	3	32	10.1317
1	8	1	32	7.89733
1	8	2	32	8.32571
1	8	3	32	10.9422
1	9	1	32	8.58835
1	9	2	32	8.60018
1	9	3	32	11.3475
1	10	1	32	8.78578
1	10	2	32	8.78317
1	10	3	32	11.5502
1	11	1	32	8.8845
1	11	2	32	8.87466
1	11	3	32	11.6515
1	12	1	32	8.8845
1	12	2	32	8.87466
1	12	3	32	11.6515
2	2	1	32	11
2	2	2	32	9.98152
2	2	3	32	11.6713
2	3	1	32	19.4
2	3	2	32	14.7874
2	3	3	32	18.6741
2	4	1	32	22.4
2	4	2	32	17.0055
2	4	3	32	21.2885
2	5	1	32	23.6
2	5	2	32	19.2237
2	5	3	32	23.9029
2	6	1	32	27
2	6	2	32	21.0721
2	6	3	32	27.3576
2	7	1	32	31.2
2	7	2	32	27.3567
2	7	3	32	30.6256
2	8	1	32	36.4
2	8	2	32	31.2384
2	8	3	32	33.24
2	9	1	32	38.6
2	9	2	32	33.2717
2	9	3	32	36.4146
2	10	1	32	41.8
2	10	2	32	35.1201
2	10	3	32	38.282
2	11	1	32	43.4
2	11	2	32	37.8928
2	11	3	32	39.9627
2	12	1	32	44
2	12	2	32	38.4473
2	12	3	32	40.8964
3	2	1	32	0.686499
3	2	2	32	0.32538
3	2	3	32	0.715564
3	3	1	32	1.83066
3	3	2	32	1.95228
3	3	3	32	1.69946
3	4	1	32	4.00458
3	4	2	32	3.36226
3	4	3	32	3.30948
3	5	1	32	5.37757
3	5	2	32	3.90456
3	5	3	32	3.84615
3	6	1	32	5.94966
3	6	2	32	4.33839
3	6	3	32	4.65116
3	7	1	32	7.43707
3	7	2	32	5.53145
3	7	3	32	5.81395
3	8	1	32	9.83982
3	8	2	32	7.15835
3	8	3	32	7.15564
3	9	1	32	11.6705
3	9	2	32	7.91757
3	9	3	32	7.60286
3	10	1	32	12.0137
3	10	2	32	9.00217
3	10	3	32	8.58676
3	11	1	32	12.4714
3	11	2	32	9.76139
3	11	3	32	8.94454
3	12	1	32	13.0435
3	12	2	32	9.97831
3	12	3	32	9.21288
1	2	1	34	0.469484
1	2	2	34	1.28968
1	2	3	34	2.09854
1	3	1	34	1.69014
1	3	2	34	2.77778
1	3	3	34	3.46715
1	4	1	34	4.60094
1	4	2	34	5.25794
1	4	3	34	6.38686
1	5	1	34	5.7277
1	5	2	34	6.25
1	5	3	34	7.75547
1	6	1	34	6.47887
1	6	2	34	6.84524
1	6	3	34	8.21168
1	7	1	34	6.66667
1	7	2	34	7.04365
1	7	3	34	8.30292
1	8	1	34	7.32394
1	8	2	34	7.53968
1	8	3	34	8.75912
1	9	1	34	7.60563
1	9	2	34	7.53968
1	9	3	34	8.75912
1	10	1	34	7.60563
1	10	2	34	7.53968
1	10	3	34	8.75912
1	11	1	34	7.69953
1	11	2	34	7.53968
1	11	3	34	8.75912
1	12	1	34	7.79343
1	12	2	34	7.53968
1	12	3	34	8.75912
2	2	1	34	9.90991
2	2	2	34	10
2	2	3	34	10
2	3	1	34	16.731
2	3	2	34	18.0328
2	3	3	34	18.8
2	4	1	34	19.4337
2	4	2	34	20.9836
2	4	3	34	22
2	5	1	34	22.5225
2	5	2	34	24.2623
2	5	3	34	25
2	6	1	34	24.453
2	6	2	34	25.5738
2	6	3	34	26
2	7	1	34	25.9974
2	7	2	34	28.5246
2	7	3	34	27.6
2	8	1	34	27.2844
2	8	2	34	29.5082
2	8	3	34	27.8
2	9	1	34	29.601
2	9	2	34	30.4918
2	9	3	34	29.8
2	10	1	34	31.1454
2	10	2	34	31.4754
2	10	3	34	30.6
2	11	1	34	32.3037
2	11	2	34	32.623
2	11	3	34	32
2	12	1	34	33.462
2	12	2	34	33.1148
2	12	3	34	32.2
3	2	1	34	1.29199
3	2	2	34	0.261952
3	2	3	34	0.628366
3	3	1	34	1.89492
3	3	2	34	0.851343
3	3	3	34	2.4237
3	4	1	34	3.61757
3	4	2	34	1.96464
3	4	3	34	3.5009
3	5	1	34	5.25409
3	5	2	34	3.40537
3	5	3	34	5.02693
3	6	1	34	6.80448
3	6	2	34	4.51866
3	6	3	34	6.1939
3	7	1	34	7.83807
3	7	2	34	4.91159
3	7	3	34	6.7325
3	8	1	34	8.52713
3	8	2	34	5.17354
3	8	3	34	7.36086
3	9	1	34	8.6994
3	9	2	34	5.23903
3	9	3	34	7.71993
3	10	1	34	9.47459
3	10	2	34	5.69745
3	10	3	34	8.34829
3	11	1	34	9.56072
3	11	2	34	5.69745
3	11	3	34	8.52783
3	12	1	34	9.73299
3	12	2	34	5.76293
3	12	3	34	8.70736
1	2	1	con	1.37795
1	2	2	con	1.27621
1	2	3	con	1.6683
1	3	1	con	1.67323
1	3	2	con	2.73473
1	3	3	con	3.3366
1	4	1	con	6.59449
1	4	2	con	7.47493
1	4	3	con	6.3788
1	5	1	con	8.95669
1	5	2	con	10.9389
1	5	3	con	8.83219
1	6	1	con	10.4331
1	6	2	con	13.9471
1	6	3	con	9.91168
1	7	1	con	11.7126
1	7	2	con	16.4084
1	7	3	con	10.7949
1	8	1	con	13.0906
1	8	2	con	19.5989
1	8	3	con	11.4818
1	9	1	con	14.2717
1	9	2	con	20.6016
1	9	3	con	12.4632
1	10	1	con	15.5512
1	10	2	con	21.6044
1	10	3	con	13.8371
1	11	1	con	18.1102
1	11	2	con	23.9745
1	11	3	con	17.37
1	12	1	con	19.7835
1	12	2	con	25.6153
1	12	3	con	19.9215
2	2	1	con	10.935
2	2	2	con	11.4543
2	2	3	con	11.0738
2	3	1	con	16.0063
2	3	2	con	15.9588
2	3	3	con	19.2953
2	4	1	con	20.4437
2	4	2	con	20.8494
2	4	3	con	22.3154
2	5	1	con	25.9905
2	5	2	con	27.1557
2	5	3	con	27.8523
2	6	1	con	32.8051
2	6	2	con	32.9472
2	6	3	con	32.5503
2	7	1	con	45.6418
2	7	2	con	44.6589
2	7	3	con	46.6443
2	8	1	con	55.7845
2	8	2	con	55.4698
2	8	3	con	54.8658
2	9	1	con	68.1458
2	9	2	con	70.1416
2	9	3	con	62.5839
2	10	1	con	70.0475
2	10	2	con	71.9434
2	10	3	con	64.7651
2	11	1	con	70.0475
2	11	2	con	71.9434
2	11	3	con	64.7651
2	12	1	con	70.0475
2	12	2	con	71.9434
2	12	3	con	64.7651
3	2	1	con	1.0101
3	2	2	con	0.717949
3	2	3	con	0.554017
3	3	1	con	3.1746
3	3	2	con	2.46154
3	3	3	con	1.66205
3	4	1	con	5.19481
3	4	2	con	3.28205
3	4	3	con	3.23176
3	5	1	con	7.93651
3	5	2	con	5.23077
3	5	3	con	5.6325
3	6	1	con	11.1111
3	6	2	con	6.5641
3	6	3	con	6.18652
3	7	1	con	20.7792
3	7	2	con	11.0769
3	7	3	con	12.2807
3	8	1	con	26.8398
3	8	2	con	16.2051
3	8	3	con	15.7895
3	9	1	con	35.0649
3	9	2	con	22.5641
3	9	3	con	19.4829
3	10	1	con	39.8268
3	10	2	con	25.0256
3	10	3	con	22.6223
3	11	1	con	47.9076
3	11	2	con	32.2051
3	11	3	con	29.1782
3	12	1	con	49.2063
3	12	2	con	34.6667
3	12	3	con	30.7479

## Sheet: body area
Fam	Age	treat	rep	Body Area
1	2	con	1	2.72033
1	2	con	2	2.42826
1	2	con	3	2.66975
1	2	o1	1	2.6736
1	2	o1	2	2.90716
1	2	o1	3	2.74104
1	2	o2	1	2.74639
1	2	o2	2	2.87759
1	2	o2	3	2.94402
1	2	o4	1	3.19508
1	2	o4	2	3.02868
1	2	o4	3	3.01553
1	2	31	1	2.89479
1	2	31	2	2.7348
1	2	31	3	2.6606
1	2	32	1	2.85067
1	2	32	2	2.75209
1	2	32	3	2.58483
1	2	34	1	2.91876
1	2	34	2	2.84656
1	2	34	3	2.8197
1	4	con	1	.
1	4	con	2	2.77841
1	4	con	3	3.28872
1	4	o1	1	.
1	4	o1	2	3.31187
1	4	o1	3	3.50561
1	4	o2	1	.
1	4	o2	2	3.55935
1	4	o2	3	3.48928
1	4	o4	1	.
1	4	o4	2	3.71
1	4	o4	3	3.75324
1	4	31	1	.
1	4	31	2	3.2494
1	4	31	3	2.98747
1	4	32	1	.
1	4	32	2	3.60202
1	4	32	3	3.25462
1	4	34	1	.
1	4	34	2	3.29665
1	4	34	3	3.35028
1	6	con	1	3.03409
1	6	con	2	3.16112
1	6	con	3	3.24403
1	6	o1	1	3.54561
1	6	o1	2	3.51446
1	6	o1	3	3.68644
1	6	o2	1	3.70009
1	6	o2	2	3.84757
1	6	o2	3	3.94456
1	6	o4	1	4.1111
1	6	o4	2	4.10381
1	6	o4	3	4.13412
1	6	31	1	3.568
1	6	31	2	3.31519
1	6	31	3	3.29359
1	6	32	1	3.63553
1	6	32	2	3.63201
1	6	32	3	3.55275
1	6	34	1	3.88928
1	6	34	2	3.79663
1	6	34	3	3.81248
1	8	con	1	3.26313
1	8	con	2	3.02693
1	8	con	3	3.31417
1	8	o1	1	3.67001
1	8	o1	2	3.86009
1	8	o1	3	3.77064
1	8	o2	1	4.02681
1	8	o2	2	4.1666
1	8	o2	3	4.20855
1	8	o4	1	4.14064
1	8	o4	2	4.22824
1	8	o4	3	4.28769
1	8	31	1	3.48783
1	8	31	2	3.47332
1	8	31	3	3.44451
1	8	32	1	3.75815
1	8	32	2	4.01186
1	8	32	3	3.90781
1	8	34	1	4.17906
1	8	34	2	4.26495
1	8	34	3	4.14192
1	10	con	1	3.36234
1	10	con	2	3.56023
1	10	con	3	3.20897
1	10	o1	1	3.9071
1	10	o1	2	3.97396
1	10	o1	3	3.7553
1	10	o2	1	4.11375
1	10	o2	2	4.26528
1	10	o2	3	4.09897
1	10	o4	1	4.04974
1	10	o4	2	4.4419
1	10	o4	3	4.50844
1	10	31	1	3.98302
1	10	31	2	3.68147
1	10	31	3	3.91805
1	10	32	1	4.05824
1	10	32	2	4.35009
1	10	32	3	3.91202
1	10	34	1	4.26428
1	10	34	2	4.40733
1	10	34	3	4.21487
1	12	con	1	3.45251
1	12	con	2	3.43061
1	12	con	3	3.55599
1	12	o1	1	4.06695
1	12	o1	2	3.91043
1	12	o1	3	4.08344
1	12	o2	1	4.30353
1	12	o2	2	4.36933
1	12	o2	3	4.37094
1	12	o4	1	4.41024
1	12	o4	2	4.52573
1	12	o4	3	4.24016
1	12	31	1	4.09252
1	12	31	2	4.17745
1	12	31	3	4.2665
1	12	32	1	4.18558
1	12	32	2	4.39581
1	12	32	3	4.41267
1	12	34	1	4.24832
1	12	34	2	4.30335
1	12	34	3	4.51569
2	2	con	1	2.28345
2	2	con	2	2.43738
2	2	con	3	2.34396
2	2	o1	1	2.49814
2	2	o1	2	2.59739
2	2	o1	3	2.58356
2	2	o2	1	2.53626
2	2	o2	2	2.43278
2	2	o2	3	2.67207
2	2	o4	1	2.45404
2	2	o4	2	2.6372
2	2	o4	3	2.75814
2	2	31	1	2.415
2	2	31	2	2.48518
2	2	31	3	2.51556
2	2	32	1	2.46027
2	2	32	2	2.4241
2	2	32	3	2.40783
2	2	34	1	2.40266
2	2	34	2	2.59968
2	2	34	3	2.4626
2	4	con	1	2.68976
2	4	con	2	2.67349
2	4	con	3	2.75626
2	4	o1	1	3.00595
2	4	o1	2	2.8717
2	4	o1	3	3.1716
2	4	o2	1	3.36192
2	4	o2	2	3.05867
2	4	o2	3	3.01503
2	4	o4	1	3.40215
2	4	o4	2	3.3502
2	4	o4	3	3.2446
2	4	31	1	3.15483
2	4	31	2	3.06288
2	4	31	3	2.88117
2	4	32	1	3.01702
2	4	32	2	3.05211
2	4	32	3	2.70567
2	4	34	1	3.09558
2	4	34	2	2.8588
2	4	34	3	3.02993
2	6	con	1	2.66525
2	6	con	2	2.64861
2	6	con	3	2.91251
2	6	o1	1	3.31071
2	6	o1	2	3.1913
2	6	o1	3	3.47023
2	6	o2	1	3.48452
2	6	o2	2	3.64478
2	6	o2	3	3.37433
2	6	o4	1	3.79188
2	6	o4	2	3.79382
2	6	o4	3	3.70256
2	6	31	1	2.83586
2	6	31	2	3.0957
2	6	31	3	3.10315
2	6	32	1	3.0512
2	6	32	2	3.06367
2	6	32	3	3.27074
2	6	34	1	3.35148
2	6	34	2	3.27236
2	6	34	3	3.22338
2	8	con	1	2.81105
2	8	con	2	2.74884
2	8	con	3	2.89277
2	8	o1	1	3.08803
2	8	o1	2	3.1012
2	8	o1	3	3.08428
2	8	o2	1	3.64002
2	8	o2	2	3.57288
2	8	o2	3	3.48779
2	8	o4	1	3.68188
2	8	o4	2	3.88314
2	8	o4	3	4.01842
2	8	31	1	2.9361
2	8	31	2	3.04241
2	8	31	3	3.02524
2	8	32	1	3.03451
2	8	32	2	3.19805
2	8	32	3	3.16881
2	8	34	1	3.82162
2	8	34	2	3.80417
2	8	34	3	3.75245
2	10	con	1	2.87494
2	10	con	2	2.85051
2	10	con	3	2.86948
2	10	o1	1	3.29461
2	10	o1	2	3.34728
2	10	o1	3	3.22883
2	10	o2	1	3.70155
2	10	o2	2	3.4766
2	10	o2	3	3.42489
2	10	o4	1	3.77751
2	10	o4	2	3.71792
2	10	o4	3	3.73285
2	10	31	1	3.10763
2	10	31	2	3.37662
2	10	31	3	3.19685
2	10	32	1	3.21617
2	10	32	2	3.28023
2	10	32	3	3.58658
2	10	34	1	4.02391
2	10	34	2	3.75854
2	10	34	3	3.67564
2	12	con	1	.
2	12	con	2	.
2	12	con	3	.
2	12	o1	1	3.2255
2	12	o1	2	3.21212
2	12	o1	3	3.21752
2	12	o2	1	3.55274
2	12	o2	2	3.56762
2	12	o2	3	3.48945
2	12	o4	1	3.65401
2	12	o4	2	3.90258
2	12	o4	3	3.82286
2	12	31	1	3.3537
2	12	31	2	3.18477
2	12	31	3	3.15256
2	12	32	1	3.63892
2	12	32	2	3.40703
2	12	32	3	3.57892
2	12	34	1	3.8481
2	12	34	2	3.8433
2	12	34	3	3.70131
3	2	con	1	2.65612
3	2	con	2	2.87014
3	2	con	3	2.88739
3	2	o1	1	2.7414
3	2	o1	2	3.13183
3	2	o1	3	2.90466
3	2	o2	1	2.91277
3	2	o2	2	3.02082
3	2	o2	3	3.1223
3	2	o4	1	3.09428
3	2	o4	2	3.1353
3	2	o4	3	2.96206
3	2	31	1	2.85728
3	2	31	2	3.05538
3	2	31	3	3.03022
3	2	32	1	2.85193
3	2	32	2	2.91302
3	2	32	3	2.97025
3	2	34	1	2.94439
3	2	34	2	3.01995
3	2	34	3	3.03259
3	4	con	1	3.13321
3	4	con	2	3.06023
3	4	con	3	3.08413
3	4	o1	1	3.27618
3	4	o1	2	3.28811
3	4	o1	3	3.29685
3	4	o2	1	3.3224
3	4	o2	2	3.46315
3	4	o2	3	3.39181
3	4	o4	1	3.46471
3	4	o4	2	3.64268
3	4	o4	3	3.54102
3	4	31	1	3.29582
3	4	31	2	3.25337
3	4	31	3	3.35603
3	4	32	1	3.29008
3	4	32	2	3.35844
3	4	32	3	3.52694
3	4	34	1	3.32048
3	4	34	2	3.33224
3	4	34	3	3.40153
3	6	con	1	3.00485
3	6	con	2	3.16363
3	6	con	3	3.09961
3	6	o1	1	3.37006
3	6	o1	2	3.36189
3	6	o1	3	3.46018
3	6	o2	1	3.58844
3	6	o2	2	3.69843
3	6	o2	3	3.62866
3	6	o4	1	3.78424
3	6	o4	2	3.86003
3	6	o4	3	3.91193
3	6	31	1	3.2142
3	6	31	2	3.24078
3	6	31	3	3.13509
3	6	32	1	3.42318
3	6	32	2	3.48327
3	6	32	3	3.34838
3	6	34	1	3.63961
3	6	34	2	3.71418
3	6	34	3	3.63921
3	8	con	1	2.97831
3	8	con	2	3.04154
3	8	con	3	3.07257
3	8	o1	1	3.31836
3	8	o1	2	3.54624
3	8	o1	3	3.45537
3	8	o2	1	3.78228
3	8	o2	2	3.68135
3	8	o2	3	3.66645
3	8	o4	1	3.94722
3	8	o4	2	3.93582
3	8	o4	3	3.72774
3	8	31	1	3.282
3	8	31	2	3.34237
3	8	31	3	3.24908
3	8	32	1	3.39592
3	8	32	2	3.39859
3	8	32	3	3.50305
3	8	34	1	3.8315
3	8	34	2	3.87286
3	8	34	3	3.78864
3	10	con	1	2.8912
3	10	con	2	2.9485
3	10	con	3	2.96526
3	10	o1	1	3.481
3	10	o1	2	3.36301
3	10	o1	3	3.48931
3	10	o2	1	3.66281
3	10	o2	2	3.94024
3	10	o2	3	3.93752
3	10	o4	1	3.75777
3	10	o4	2	3.93333
3	10	o4	3	3.86065
3	10	31	1	3.35031
3	10	31	2	3.19767
3	10	31	3	3.25885
3	10	32	1	3.64795
3	10	32	2	3.39519
3	10	32	3	3.45987
3	10	34	1	3.9136
3	10	34	2	3.96087
3	10	34	3	3.78877
3	12	con	1	2.92767
3	12	con	2	2.96768
3	12	con	3	3.03827
3	12	o1	1	3.65393
3	12	o1	2	3.58386
3	12	o1	3	3.43393
3	12	o2	1	3.96737
3	12	o2	2	3.93802
3	12	o2	3	4.11635
3	12	o4	1	3.96996
3	12	o4	2	3.60037
3	12	o4	3	3.78223
3	12	31	1	3.64124
3	12	31	2	3.35851
3	12	31	3	3.32225
3	12	32	1	3.64656
3	12	32	2	3.57505
3	12	32	3	3.50439
3	12	34	1	4.02209
3	12	34	2	4.02883
3	12	34	3	3.91199

## Sheet: growth_utilization_efficiency
Fam	Age	treat	rep	Growth (mm²/d)	Utilization (mm²/d)	Efficiency
1	0-12	con	1	0.18656	0.00897036	0.690142
1	0-12	con	2	0.18437	0.00903585	0.68142
1	0-12	con	3	0.196908	0.00909588	0.697467
1	0-12	o1	1	0.248004	0.00839277	0.832433
1	0-12	o1	2	0.232352	0.00886322	0.76806
1	0-12	o1	3	0.249653	0.00894546	0.78302
1	0-12	o2	1	0.271662	0.00835106	0.866019
1	0-12	o2	2	0.278242	0.00849888	0.858443
1	0-12	o2	3	0.278403	0.00857142	0.851357
1	0-12	o4	1	0.282333	0.0075936	0.965866
1	0-12	o4	2	0.293882	0.00829149	0.897256
1	0-12	o4	3	0.265325	0.00756872	0.947192
1	0-12	31	1	0.250561	0.00910218	0.770624
1	0-12	31	2	0.259054	0.00883326	0.804309
1	0-12	31	3	0.267959	0.00899441	0.799998
1	0-12	32	1	0.259867	0.00896265	0.793641
1	0-12	32	2	0.28089	0.00894799	0.818157
1	0-12	32	3	0.282576	0.00909569	0.806609
1	0-12	34	1	0.266141	0.00875769	0.81954
1	0-12	34	2	0.271644	0.00887931	0.814479
1	0-12	34	3	0.292878	0.00881607	0.842855
2	0-12	con	1	.	.	.
2	0-12	con	2	.	.	.
2	0-12	con	3	.	.	.
2	0-12	o1	1	0.184332	0.00736343	0.883093
2	0-12	o1	2	0.182994	0.00695298	0.932303
2	0-12	o1	3	0.183534	0.00705606	0.919848
2	0-12	o2	1	0.217056	0.00689933	1.00759
2	0-12	o2	2	0.218544	0.00736539	0.94634
2	0-12	o2	3	0.210727	0.00720416	0.953811
2	0-12	o4	1	0.227183	0.00708188	0.998942
2	0-12	o4	2	0.25204	0.00701575	1.04743
2	0-12	o4	3	0.244069	0.00694384	1.04618
2	0-12	31	1	0.197153	0.00749382	0.8926
2	0-12	31	2	0.180259	0.00746204	0.863066
2	0-12	31	3	0.177039	0.00734461	0.869997
2	0-12	32	1	0.225675	0.00741604	0.951525
2	0-12	32	2	0.202485	0.00714197	0.94685
2	0-12	32	3	0.219675	0.00698555	0.999791
2	0-12	34	1	0.246592	0.00737337	0.988892
2	0-12	34	2	0.246112	0.00745578	0.977278
2	0-12	34	3	0.231913	0.00737478	0.966726
3	0-12	con	1	0.174874	.	.
3	0-12	con	2	0.131711	.	.
3	0-12	con	3	0.13877	0.00689194	0.650246
3	0-12	o1	1	0.200336	0.00663616	0.810646
3	0-12	o1	2	0.19333	0.00674613	0.784587
3	0-12	o1	3	0.178337	0.00680146	0.749195
3	0-12	o2	1	0.23168	0.00670062	0.855105
3	0-12	o2	2	0.228746	0.00657786	0.86644
3	0-12	o2	3	0.246579	0.00648131	0.906836
3	0-12	o4	1	0.23194	0.00633253	0.905233
3	0-12	o4	2	0.194981	0.0061709	0.861082
3	0-12	o4	3	0.213167	0.00601798	0.918901
3	0-12	31	1	0.199067	0.00679844	0.789023
3	0-12	31	2	0.170794	0.00699562	0.713261
3	0-12	31	3	0.167168	0.00680402	0.725612
3	0-12	32	1	0.199599	0.00688166	0.780425
3	0-12	32	2	0.192449	0.00683154	0.773147
3	0-12	32	3	0.185383	0.00695289	0.746517
3	0-12	34	1	0.237152	0.00681833	0.848489
3	0-12	34	2	0.237826	0.00707313	0.818875
3	0-12	34	3	0.226142	0.00686471	0.826248

## Sheet: Deformities
Fam	Treat	Rep	Heart	Emaciacion/thin	Spinal
1	con	1	16.6667	66.6667	41.1765
1	con	2	16.6667	66.6667	37.7049
1	con	3	16.6667	50	27.1429
1	o1	1	85.7143	14.2857	8.33333
1	o1	2	66.6667	16.6667	3.94737
1	o1	3	66.6667	16.6667	10.1695
1	o2	1	83.3333	0	1.66667
1	o2	2	100	0	4.16667
1	o2	3	100	0	3.79747
1	o4	1	100	0	1.96078
1	o4	2	100	0	1.7094
1	o4	3	100	0	3.92157
1	31	1	33.3333	0	11.4286
1	31	2	83.3333	0	17.0732
1	31	3	50	0	2.85714
1	32	1	66.6667	0	8.92857
1	32	2	66.6667	0	9.87654
1	32	3	66.6667	0	3.44828
1	34	1	83.3333	16.6667	7.07071
1	34	2	83.3333	0	6.32911
1	34	3	100	0	1.07527
2	con	1	.	.	.
2	con	2	.	.	.
2	con	3	.	.	.
2	o1	1	33.3333	66.6667	36.3636
2	o1	2	44.4444	66.6667	61.7647
2	o1	3	44.4444	66.6667	30.7692
2	o2	1	44.4444	22.2222	20.4082
2	o2	2	44.4444	33.3333	26.3158
2	o2	3	44.4444	33.3333	16.1765
2	o4	1	66.6667	11.1111	8.24742
2	o4	2	88.8889	11.1111	12
2	o4	3	88.8889	11.1111	7.59494
2	31	1	11.1111	66.6667	31.7073
2	31	2	11.1111	88.8889	55.8824
2	31	3	22.2222	77.7778	57.1429
2	32	1	55.5556	44.4444	39.5349
2	32	2	33.3333	55.5556	35
2	32	3	44.4444	44.4444	29.3706
2	34	1	66.6667	22.2222	22.1053
2	34	2	55.5556	22.2222	23.1884
2	34	3	66.6667	22.2222	24.5614
3	con	1	0	88.8889	92.3077
3	con	2	0	100	52.0833
3	con	3	22.2222	66.6667	45.2381
3	o1	1	66.6667	22.2222	4.71698
3	o1	2	55.5556	22.2222	8.13008
3	o1	3	66.6667	33.3333	5.98291
3	o2	1	100	0	5.02793
3	o2	2	100	22.2222	4.24528
3	o2	3	100	11.1111	1.52284
3	o4	1	100	0	1.95122
3	o4	2	100	11.1111	1.92308
3	o4	3	100	11.1111	0
3	31	1	55.5556	33.3333	16.1677
3	31	2	55.5556	44.4444	26.3736
3	31	3	33.3333	66.6667	25.8065
3	32	1	77.7778	33.3333	15.4639
3	32	2	77.7778	33.3333	20.2899
3	32	3	66.6667	44.4444	16.3265
3	34	1	100	0	10.6557
3	34	2	100	11.1111	8.83978
3	34	3	100	11.1111	10.0719

## Sheet: Gene expression 
fam	age	treat	rep	nkcc1a	nkcc2a	nkcc2b	aqp-3	aqp1-dub	aqp-e	hsp-70	hsp-90	thr-aa	thr-ab	thr-bb	dio-1	dio-2	dio-3	atp6	cox1
1	2	o1	1	0.874892	0.286491	0.513901	2.22865	0.401875	0.37286	0.329862	0.766496	1	1.37776	2.75273	.	0.902189	0.908189	1.27218	1.30386
1	2	o1	2	0.412643	0.600741	1.00266	1.62842	0.467753	0.142714	0.227651	0.463414	1.26787	0.814	2.36218	.	0.522097	0.216432	0.938942	0.957943
1	4	o1	1	0.470619	0.726389	3.98163	2.35937	0.221407	0.109833	0.392275	0.387579	15.2622	1.18425	2.78792	.	0.879612	0.222147	0.894995	0.914277
1	4	o1	2	0.755459	0.967147	3.52766	2.24013	0.168818	0.0796521	0.250533	0.222975	5.74053	1.08372	2.731	.	0.432231	0.0853752	1.17481	1.60506
1	6	o1	1	0.768799	2.02145	5.06836	4.30253	0.110076	0.381176	0.685088	0.437067	28.836	2.54072	5.93365	.	1.33276	0.168163	0.851077	1.16184
1	6	o1	2	1.1421	0.817177	4.24509	2.33683	0.175243	0.553349	0.504979	0.275356	9.24343	1.93182	3.89104	.	0.562015	0.269757	0.789188	0.856736
1	8	o1	1	0.494022	0.875348	1.22484	5.15843	0.0977183	.	0.488984	0.171492	8.70221	.	7.06731	.	1.11115	0.276397	0.307272	1.00632
1	8	o1	2	0.720865	0.652419	3.48675	2.08508	0.0546138	0.195125	0.431225	0.100262	3.66688	2.69687	3.78105	.	0.266868	0.212782	1.02064	0.999733
1	10	o1	1	0.08004	6.97607	16.6297	3.9395	0.110471	1.48455	1.6335	1.21558	15.1887	8.19294	8.53823	.	1.74479	0.224348	1.48299	1.64071
1	10	o1	2	0.936126	5.65427	19.4071	3.87257	0.0865002	0.586416	1.22451	1.06501	6.4525	4.08073	4.4038	.	1.55707	0.238001	0.869658	1.01225
1	12	o1	1	0.701642	29.1806	29.6852	7.16717	0.209469	12.4724	2.21203	1.64694	5.67942	4.30112	12.1955	.	2.8739	0.330994	1.44492	1.45512
1	12	o1	2	1.71567	24.3025	52.7215	4.03694	0.151627	4.38094	2.38129	1.07734	7.62925	6.1088	6.19849	.	3.23222	0.347174	0.753502	0.730007
1	2	o2	1	0.532904	0.101359	1.29184	3.67204	0.564103	0.00545567	0.446702	0.307574	7.41162	0.784525	1.19898	.	0.407347	0.945747	0.754023	0.776794
1	2	o2	2	0.137723	.	0.334085	.	0.118265	.	0.21804	.	8.46916	.	.	.	0.360513	0.553968	0.681555	2.12787
1	4	o2	1	0.807519	1.04665	5.4685	2.71744	0.240393	0.333176	0.438143	0.409174	13.8846	1.1739	2.43467	.	0.778619	0.234536	0.839617	0.917442
1	4	o2	2	.	1.75141	8.40961	4.01176	0.287372	1.09717	0.672479	0.337422	7.0317	2.11734	5.08427	.	1.09121	0.244605	0.67895	0.746956
1	6	o2	1	0.8187	1.56883	4.8411	3.47766	0.118878	0.303122	0.52917	0.380259	.	1.9883	2.41891	.	0.903068	0.156597	0.831305	1.055
1	6	o2	2	.	0.522809	6.05655	2.84353	0.150717	0.332539	0.665711	0.217576	14.5014	1.67622	3.05032	.	0.660832	0.350599	0.641256	0.696204
1	8	o2	1	0.247239	0.71154	0.893365	1.92168	0.0224872	.	1.81103	0.0484431	.	1.60965	3.35251	.	1.92835	0.443745	0.182246	1.01253
1	8	o2	2	.	1.32296	3.56571	3.82347	0.0600632	1.49331	0.986381	0.371302	13.1507	5.21087	5.88071	.	0.973523	0.243666	0.894908	1.04701
1	10	o2	1	.	3.39516	5.73826	.	0.223691	.	8.98686	1.30165	10.1048	8.06451	.	.	.	0.327464	0.367496	1.18517
1	10	o2	2	1.7223	3.84561	10.9711	3.635	0.0864421	0.425431	1.36061	1.03115	6.8036	6.73237	7.73316	.	1.55235	0.259263	0.805068	0.838613
1	12	o2	1	.	.	29.4931	.	.	.	.	.	17.2648	.	.	.	.	.	1.91065	2.2573
1	12	o2	2	2.92679	22.3117	22.9711	8.04636	0.138971	8.59393	2.29296	1.57016	9.05845	12.3109	10.9361	.	2.37094	0.138718	1.39628	1.52466
1	2	o4	1	0.458868	0.396462	0.608974	1.81526	0.376152	0.18643	0.205158	0.619569	7.82498	0.758724	0.568007	.	0.539582	0.422523	1.13145	1.1529
1	2	o4	2	0.905993	1.44924	1.0503	5.36026	0.485991	.	0.971528	0.630919	6.23445	1.47636	6.73743	.	1.52828	0.31577	0.921522	0.939439
1	4	o4	1	0.547108	0.816315	3.44441	1.72554	0.214809	0.177169	0.586772	0.383494	12.1719	1.49069	3.83378	.	0.701252	0.212455	0.848171	0.908828
1	4	o4	2	0.267095	0.112564	3.52762	0.502691	0.103688	0.108978	0.282097	.	8.28753	0.328263	1.64561	.	0.135601	0.164086	0.701175	0.704662
1	6	o4	1	0.590077	1.05089	3.1676	2.25763	0.0919893	0.404735	0.623908	0.311086	12.2046	2.21466	3.072	.	0.479825	0.131662	1.06161	1.28363
1	6	o4	2	0.966769	0.996556	3.83232	2.45364	0.152848	0.580772	0.703004	0.262354	6.72666	1.45097	5.19922	.	0.319869	0.110811	0.95753	1.0232
1	8	o4	1	.	.	5.38301	.	.	.	.	.	9.88665	.	.	.	.	0.215695	.	.
1	8	o4	2	.	2.23591	2.45473	3.09182	0.0762413	0.927072	0.988954	0.432411	9.84438	3.03243	6.06362	.	1.15261	0.16349	1.16479	1.40419
1	10	o4	1	0.040041	2.69102	11.5458	3.27645	0.126034	1.05859	3.13744	1.40013	7.2818	3.97977	7.69661	.	1.73983	0.524755	1.05513	1.11804
1	10	o4	2	0.823358	2.24467	7.73471	2.93137	0.0716541	0.388208	1.23611	0.649977	4.84333	2.77866	3.12198	.	1.1017	0.256911	0.998435	1.13211
1	12	o4	1	0.538143	19.8166	17.0635	.	.	.	.	.	38.2278	17.6666	.	.	.	0.382808	1.39769	1.73345
1	12	o4	2	1.01234	2.10071	13.0527	2.54356	0.0522211	0.707901	2.212	0.267055	4.99281	6.08834	3.84711	.	0.746226	0.16659	0.81664	0.901742
1	2	31	1	0.597689	0.45044	0.804093	1.3862	0.396154	0.160955	0.307994	0.563406	13.452	1.11321	1.31748	.	0.393917	0.460654	0.997916	0.98977
1	2	31	2	0.235382	0.359548	1.0156	3.49974	0.684152	0.438251	0.472192	0.335601	8.28272	0.996381	2.12997	.	1.01705	0.515305	0.808221	0.80049
1	4	31	1	1.11887	0.998483	5.93066	3.61229	0.289688	0.452714	0.839717	0.640567	1.96078	1.7252	3.25631	.	1.15955	0.323517	0.697612	0.71029
1	4	31	2	1.12514	0.538493	3.42782	2.42109	0.202443	0.587984	0.561857	0.223031	0.957061	1.51692	2.97971	.	0.583011	0.221414	0.795623	0.877135
1	6	31	1	0.403272	0.903679	4.32742	2.55594	0.114354	0.18799	0.519948	0.38222	0.953998	1.78182	3.12907	.	0.817007	0.176128	0.980041	1.09348
1	6	31	2	1.12901	0.786934	3.24754	4.05148	0.157978	0.232789	0.366783	0.134026	2.99445	2.61891	4.26743	.	0.721035	0.160524	0.977508	1.101
1	8	31	1	0.674478	1.80121	6.55091	3.94132	0.147956	1.37304	1.48496	0.827008	0.736386	2.53366	8.74411	.	2.30912	0.388125	0.867589	0.975384
1	8	31	2	.	2.01093	3.38381	4.33115	0.0750123	1.32926	0.987282	0.3088	2.62677	4.54527	6.34479	.	1.17631	0.181138	1.24208	1.37353
1	10	31	1	0.0484819	3.59759	10.0426	4.59533	0.0453669	0.525141	1.50927	0.306499	1.24837	3.06218	11.103	.	0.791248	0.450884	1.04237	1.07511
1	10	31	2	1.65439	3.69574	10.0641	3.78126	0.0537318	0.725443	1.23983	0.697232	1.13641	4.95078	5.75661	.	1.48029	0.168291	1.15108	1.30048
1	12	31	1	1.96029	9.99424	18.4886	4.02269	0.163025	2.33789	2.00537	.	0.714512	6.77533	6.58629	.	1.68301	0.105997	1.03631	1.0206
1	12	31	2	1.26654	17.1139	28.4523	4.35562	0.135226	2.42542	1.77618	1.70798	2.02436	3.69074	4.64392	.	3.03705	0.211497	1.22375	1.35355
1	2	32	1	0.739358	0.423226	1.19309	2.13076	0.501181	0.119831	0.236194	0.760688	1.05869	0.680021	1.11298	.	0.680978	0.630907	1.06163	1.0782
1	2	32	2	1.24422	0.430313	0.945447	3.43529	0.883546	0.300639	0.898769	0.636731	1.98201	1.27074	3.43008	.	0.995047	0.655686	0.736835	0.76431
1	4	32	1	0.82296	0.598263	1.51785	3.00231	0.111001	0.820288	0.63894	0.21221	1.32049	2.31909	4.12342	.	0.635776	0.0546391	1.70212	1.87102
1	4	32	2	1.12178	0.456678	2.09127	2.78054	0.180305	0.760236	0.408749	0.274271	1.83655	1.34395	2.78102	.	0.646137	0.159432	1.08038	1.11858
1	6	32	1	0.216986	1.73346	5.01661	2.5535	0.133783	0.767765	0.756031	0.348718	2.3748	2.77865	5.61835	.	1.3763	0.20848	0.932002	1.27743
1	6	32	2	1.68924	0.194072	5.02405	2.99055	0.0773514	0.0440088	0.313583	.	2.94468	.	2.44545	.	0.198179	0.16074	0.786994	0.845998
1	8	32	1	.	.	.	.	.	.	2.94406	.	1.5505	.	.	.	.	.	.	.
1	8	32	2	.	3.99106	4.82678	9.1058	0.0649119	.	1.08925	0.541551	3.76027	8.92802	12.1717	.	2.65541	0.191143	0.715061	2.33928
1	10	32	1	1.18735	4.38157	24.5126	3.41072	0.111705	0.433852	1.0377	0.444265	2.89872	6.44473	6.23006	.	0.925121	0.432188	0.626049	0.656733
1	10	32	2	1.08855	4.21407	10.8541	3.38758	0.06973	0.960117	1.18568	0.800997	4.91661	5.75311	5.00362	.	1.42941	0.190381	1.12388	1.30442
1	12	32	1	0.0434177	10.8982	20.7689	3.77216	0.149653	3.96919	2.83836	0.999912	3.55474	6.5997	7.87293	.	1.66908	0.321081	1.03337	1.05398
1	12	32	2	1.0754	13.3411	17.0683	3.88508	0.101746	3.29704	1.8726	1.4114	4.31621	5.29229	8.8496	.	1.73088	0.163693	0.988048	1.00695
1	2	34	1	0.517734	0.410287	0.772942	1.65412	0.568519	.	0.209965	0.721474	9.48225	0.609515	1.07594	.	0.530956	0.462786	1.16079	1.13955
1	2	34	2	0.822321	0.552832	1.61022	2.45385	0.528308	0.115402	0.323451	0.809038	4.70295	0.610349	1.95578	.	1.03476	0.690871	1.05751	1.08594
1	4	34	1	0.750846	0.556864	1.43526	2.95794	0.120007	0.530411	0.502445	0.310746	5.10182	1.9768	3.87766	.	0.795405	0.0889917	1.98282	2.32104
1	4	34	2	0.71627	0.831694	5.04815	3.22766	0.305495	0.451783	0.75325	0.479763	2.66563	0.895479	4.31467	.	0.534824	0.30011	0.845054	0.900751
1	6	34	1	0.200481	1.18759	6.42947	3.2603	0.186812	0.317899	1.17311	0.577963	3.39434	2.30828	2.82693	.	1.32427	0.249524	0.849747	0.93495
1	6	34	2	.	1.02327	5.73684	4.30432	0.14309	0.476305	0.89026	0.373879	2.71237	2.70231	3.92178	.	1.2633	0.314766	0.668468	0.690276
1	8	34	1	0.161902	1.09049	2.1372	3.72613	0.0655491	0.359475	0.993637	0.47166	2.5935	5.94413	9.41239	.	1.15885	0.157267	1.49214	1.64442
1	8	34	2	.	1.97735	3.34124	3.96905	0.0940315	0.692026	1.15089	0.431667	3.32152	5.74387	6.18611	.	1.31492	0.212072	0.933544	1.21377
1	10	34	1	0.875416	2.50714	8.7841	2.46153	0.0665312	0.2259	1.04027	0.557511	3.10544	4.41464	3.53922	.	0.929744	0.191695	1.21558	1.41732
1	10	34	2	0.713861	2.52926	6.07805	3.54145	0.0678617	0.49126	1.22589	0.551792	5.41501	4.68732	4.93283	.	1.36655	0.16975	1.25617	1.41178
1	12	34	1	0.442914	15.8784	15.9386	3.15379	0.192983	2.12345	2.33685	1.01809	4.61443	6.28739	9.56672	.	2.3331	0.239589	1.1244	1.15765
1	12	34	2	0.669556	9.68377	32.1315	1.29453	0.183232	2.88935	1.40149	0.784364	4.23617	2.00839	5.30699	.	1.02247	0.343812	0.777631	0.757374
1	2	con	1	0.751251	0.491291	1.23639	1.56424	0.490609	0.111421	0.313347	0.706896	9.24482	0.631738	1.70274	.	0.84893	0.650156	1.12644	1.14745
1	2	con	2	.	.	.	.	.	.	.	.	.	.	.	.	.	.	.	.
1	4	con	1	1.16974	0.730703	2.15427	2.97725	0.147012	0.333408	0.453922	0.256303	13.8517	2.0658	2.88411	.	0.820456	0.118189	1.65131	1.84388
1	4	con	2	2.55747	3.72036	5.50481	19.576	0.471889	31.5199	2.37376	1.1975	7.1543	6.4679	29.6704	.	4.4885	0.351468	1.74364	.
1	6	con	1	.	.	.	.	.	.	.	.	.	1.55138	.	.	.	0.126224	0.791384	1.0747
1	6	con	2	1.81041	2.03874	3.11403	3.60002	0.134702	1.59008	0.820896	0.357695	4.52448	3.81573	8.0734	.	1.37865	0.119687	1.28604	1.78033
1	8	con	1	.	2.60154	3.88807	8.66877	0.0789625	1.16199	2.87176	0.689911	5.98062	8.16019	18.3137	.	2.6066	0.206347	2.00182	2.41371
1	8	con	2	2.79903	1.49563	5.88857	4.33959	0.0705422	0.35878	1.4867	0.328063	7.186	3.62763	5.35879	.	0.731999	0.402329	0.732365	0.792254
1	10	con	1	2.88464	7.7277	25.2309	3.43508	0.112842	0.917173	1.31328	0.91182	2.25473	6.35786	6.27786	.	1.30894	0.464861	0.835318	0.844262
1	10	con	2	1.66307	3.93159	4.16054	3.13005	0.0791776	1.06061	1.00136	0.442984	8.24105	6.61125	5.48586	.	1.438	0.123825	1.85825	1.9631
1	12	con	1	1.11662	30.4537	55.6744	5.814	0.188609	4.24861	2.72753	1.99224	11.1636	4.47857	6.54317	.	2.31683	0.344682	1.13746	1.15507
1	12	con	2	1.40103	31.0959	57.0877	5.52959	0.19777	4.92304	2.31491	2.20365	7.11445	4.19329	5.88408	.	2.53793	0.395361	0.831144	0.829249
2	2	o1	1	0.515467	.	1.76481	.	0.922329	.	.	.	.	.	.	.	.	.	0.328417	2.15074
2	2	o1	2	0.463601	0.54979	0.805693	6.23187	0.943997	0.00476891	0.50021	1.10309	3.93816	1.63144	1.93708	12.5093	0.902726	0.483562	1.09572	1.58038
2	4	o1	1	0.310114	0.239662	2.76829	2.70656	0.381341	0.183039	0.579361	0.549601	2.7034	1.35581	1.93253	19.573	0.551514	0.246825	1.06872	1.11221
2	4	o1	2	0.0461173	1.1126	13.4003	9.04378	.	0.518594	2.10341	1.45729	5.16609	2.5029	6.12923	.	1.60279	0.925559	0.819179	0.846826
2	6	o1	1	0.221525	0.879548	4.36739	2.91383	0.170224	0.139595	0.812261	0.409903	5.06114	1.48001	1.93925	22.5931	0.546869	0.140199	0.991882	1.0642
2	6	o1	2	0.140544	2.09774	.	6.98136	0.446394	0.512577	1.93372	1.01429	3.75147	3.18506	8.08271	32.819	1.3831	0.222737	0.82021	0.91749
2	8	o1	1	0.143492	1.98958	6.68094	4.84074	0.140942	0.349064	2.60783	1.22898	2.59439	1.94264	3.14918	26.4894	0.84935	0.153177	0.846721	0.904144
2	8	o1	2	0.467517	3.29769	8.369	6.16124	0.114183	0.717045	2.33109	1.18548	6.2509	2.34757	4.28988	17.6455	0.960163	0.186209	0.756222	0.955412
2	10	o1	1	0.372532	2.9202	10.5431	4.09698	0.0997671	0.397994	2.01121	1.07052	2.60166	2.89694	2.72985	37.4493	0.908885	0.141029	1.07465	1.17003
2	10	o1	2	1.06664	7.17136	23.9883	7.69729	0.139464	0.591146	4.90425	2.23541	8.18619	4.04378	4.07696	37.0389	1.04761	0.233632	1.07328	0.767536
2	12	o1	1	0.440423	16.071	36.2994	5.10225	0.10598	2.45274	2.93815	2.06214	4.39655	3.04283	2.42214	48.547	1.51477	0.207906	0.906464	0.938956
2	12	o1	2	0.411597	15.8215	45.1044	8.8349	0.138723	4.28717	4.07148	1.8602	6.87022	3.40866	4.39766	47.4688	1.60839	0.341949	0.755757	0.751368
2	2	o2	1	0.562099	0.260057	0.39332	3.51924	1.14553	0.0853044	0.171358	0.959333	4.09259	0.838705	0.872369	20.6812	0.64304	0.676205	1.04923	1.10977
2	2	o2	2	0.0476632	.	0.996863	5.48561	1.55147	0.0556985	0.334887	0.491055	2.47803	0.709844	0.532765	13.3027	0.0772723	.	0.790116	0.823907
2	4	o2	1	0.278263	0.184779	2.29419	2.7718	0.383583	0.392277	0.57805	0.542665	3.70958	1.24866	1.4062	25.851	0.643541	0.211038	1.08066	1.12897
2	4	o2	2	0.0459175	0.497804	7.6069	9.18533	0.628677	0.500362	1.74596	1.11783	3.75231	2.43736	6.14243	26.9948	1.34171	0.480724	1.05581	1.30117
2	6	o2	1	0.515773	0.903994	3.51125	2.47219	0.187891	0.233141	0.807194	0.477316	5.00312	1.34005	1.3385	31.0418	0.415937	0.0911289	0.981459	1.07634
2	6	o2	2	0.0591191	0.412969	1.23365	5.63634	0.0324248	0.743305	2.94348	.	5.33862	1.09936	4.11721	18.0527	1.07634	0.162832	.	1.46698
2	8	o2	1	0.407938	1.8802	6.1748	4.05245	0.140649	0.41536	1.43879	0.630587	5.58542	2.49871	2.63006	33.1551	0.583537	0.15464	0.79668	0.894647
2	8	o2	2	1.80595	11.8358	11.0426	.	0.46274	.	4.3735	1.56984	1.86978	9.6104	.	32.4742	.	0.18201	0.658876	1.20389
2	10	o2	1	0.433224	4.91381	18.0866	5.6707	0.112699	0.874146	1.97375	1.01668	2.64802	4.32036	4.78362	46.8378	0.958213	0.19058	0.643063	0.643386
2	10	o2	2	0.429239	4.24731	7.12664	7.77389	0.0475748	0.502403	1.66079	0.774163	5.45887	4.24871	4.32271	15.9848	1.05986	0.113754	0.867693	2.20622
2	12	o2	1	0.332934	19.5104	43.8504	6.58142	0.155881	2.56194	3.66442	2.37146	4.83447	3.58063	5.27395	71.3973	2.04857	0.32137	0.928469	0.982527
2	12	o2	2	0.389762	18.2527	32.1924	6.85039	0.103081	3.58472	2.99672	2.17981	4.54447	4.3768	6.49878	37.2729	1.78953	0.187159	0.915359	1.04139
2	2	o4	1	0.525547	0.290894	0.686503	2.93484	1.04553	.	0.207832	0.87022	5.03898	1.17257	0.679951	16.1246	0.600765	0.728696	1.0336	1.12094
2	2	o4	2	0.152574	0.237352	1.7689	9.31612	1.76923	0.199849	0.636409	1.03402	4.96935	1.10673	1.11739	28.3959	0.354439	1.17864	0.791985	0.773662
2	4	o4	1	0.239787	0.300566	3.03883	2.44907	0.388578	0.0640999	0.801977	0.549078	4.00593	1.38005	2.05388	23.7949	0.755302	0.34275	0.979681	1.05655
2	4	o4	2	0.074301	2.05553	4.05508	14.6161	0.358246	.	4.33772	0.664309	4.55723	4.15903	18.4522	23.6067	5.2685	0.344739	0.451261	1.87636
2	6	o4	1	0.219334	0.937825	2.93212	2.15539	0.161767	0.530316	1.12648	0.42222	3.4672	1.71155	2.84247	13.3639	0.325285	0.0889692	0.914522	0.978074
2	6	o4	2	0.494141	0.832733	6.02501	4.07769	0.158735	0.305065	1.46214	0.451055	3.7662	2.28354	5.17325	13.4621	0.893797	0.119342	0.845192	0.948072
2	8	o4	1	0.672565	2.44655	9.04679	5.54183	0.156502	0.218861	2.16628	0.697739	4.34141	3.25595	5.54273	28.9491	0.941902	0.153856	0.716368	0.725562
2	8	o4	2	0.670947	1.56793	4.39235	4.4643	0.0927221	0.815965	1.70609	0.623025	4.46684	2.47656	6.16371	30.5456	1.05258	0.101121	0.888033	1.11425
2	10	o4	1	0.242862	2.81112	8.56718	3.14824	0.0670878	0.518896	1.68476	0.857826	.	1.83193	3.72079	28.9654	1.13281	0.174752	1.1062	1.18604
2	10	o4	2	0.864942	6.29715	17.3839	5.60659	0.1381	0.895393	3.47892	1.52339	35.5302	4.60394	8.37658	36.3359	1.41424	0.302906	0.866006	0.754182
2	12	o4	1	0.619961	7.14823	16.6546	3.32552	0.0616603	0.804831	2.74476	1.55252	5.87242	2.40083	1.94657	40.1958	0.889763	0.188801	1.0015	1.04933
2	12	o4	2	0.445545	10.0858	29.9677	5.92565	0.1175	1.09508	4.81229	2.15085	8.72097	4.01695	5.87197	66.0199	1.81734	0.332304	1.10538	0.801054
2	2	31	1	0.425985	0.234809	0.486885	1.46013	0.95904	0.539677	0.106106	0.911774	0.780421	0.815877	0.745711	.	0.365828	0.538096	1.40376	1.41825
2	2	31	2	.	0.000864521	.	7.28419	.	.	0.105563	.	0.810075	.	.	11.8605	.	.	0.951918	0.920934
2	4	31	1	0.377803	0.357448	4.52586	3.50855	0.456515	0.243818	0.662721	0.66728	0.795313	1.6173	1.91747	27.5761	0.696893	0.363054	0.822121	0.801781
2	4	31	2	0.375015	2.05621	7.8508	12.8759	0.678071	13.0888	1.98123	1.09933	0.540483	2.93114	19.1526	15.5179	2.7377	0.305896	0.847806	1.16944
2	6	31	1	0.0805835	0.947074	4.69093	2.20436	0.178077	0.269319	0.774633	0.525458	2.0591	1.19475	1.38564	16.8919	0.558111	0.138661	0.913157	0.948572
2	6	31	2	0.0620255	2.67047	8.78599	6.70689	0.202686	1.83196	1.9477	0.817267	0.681904	2.76944	7.30951	13.8249	1.2434	0.125933	0.828564	1.1673
2	8	31	1	0.68907	4.02693	10.8918	9.57016	0.185836	0.597106	4.82606	2.04619	3.35843	3.0172	5.48647	28.7508	1.52687	0.219629	0.733224	1.1591
2	8	31	2	0.634686	1.8248	6.93706	7.7085	0.116456	0.813546	5.99432	2.53939	7.00544	2.90336	5.52598	.	0.92276	0.210358	1.21465	0.87159
2	10	31	1	0.319868	4.49064	13.1786	4.8283	0.121706	0.744598	4.11847	2.13707	0.623062	2.35101	2.89101	28.8441	0.931181	0.180127	0.881221	0.914101
2	10	31	2	0.492315	11.7085	31.329	11.9806	0.186438	2.69787	6.58713	3.60497	1.91083	5.25199	8.98916	39.9733	2.58841	0.303784	0.810519	0.87135
2	12	31	1	0.922283	25.1005	42.9166	10.5	0.16357	4.02625	3.45898	2.62048	0.668817	4.46488	5.59257	42.7042	1.99761	0.359014	1.17629	1.06276
2	12	31	2	0.349171	20.2472	25.7082	8.56066	0.116609	5.68111	3.62925	2.11794	1.14583	4.1502	4.55477	71.6893	1.63402	0.225378	1.07397	1.16151
2	2	32	1	0.525299	0.241335	0.531347	2.56297	1.02826	0.480113	0.182622	0.970163	1.06763	0.964038	0.503263	14.8973	0.491807	0.646368	1.17441	1.312
2	2	32	2	.	.	.	.	.	.	.	.	3.06275	.	.	21.5737	.	0.762655	0.211024	0.907893
2	4	32	1	0.351755	0.375001	3.12957	2.73536	0.409687	0.288753	0.530027	0.638736	1.24152	1.12973	1.25613	17.2127	0.533745	0.254383	1.05433	1.10348
2	4	32	2	0.0966381	0.276913	5.50539	5.69399	0.6573	0.417627	1.02694	0.937245	8.4584	1.39709	3.08897	30.9729	1.0854	0.426945	0.995369	0.987589
2	6	32	1	0.213426	0.989113	3.84835	2.86813	0.134745	0.683398	0.817329	0.480154	1.54268	1.30889	1.44688	21.0854	0.551245	0.10164	1.02164	1.11975
2	6	32	2	0.590715	2.56029	7.51143	5.19319	0.174442	1.92024	1.53507	0.612487	3.94933	2.36692	5.31571	13.8661	0.891483	0.106483	0.779716	1.07074
2	8	32	1	0.553975	3.24497	8.94582	7.73265	0.132289	0.742864	1.49655	0.784888	0.9302	2.68085	3.27979	22.9705	0.684593	0.151782	0.730925	0.818642
2	8	32	2	0.655574	5.28959	12.0229	7.89649	0.170212	0.719267	2.39354	0.891358	1.66141	3.15688	5.74494	21.1633	0.946712	0.152346	0.712512	0.841106
2	10	32	1	0.479993	6.80753	22.5067	5.54111	0.121213	0.581878	2.5776	2.15884	1.13715	4.15328	3.77691	56.8804	1.00322	0.219677	0.675185	0.685492
2	10	32	2	0.696716	11.8691	20.5777	10.3875	0.10943	2.00762	3.62831	1.80803	5.70838	5.15473	8.95965	16.5511	1.82318	0.144518	0.867737	1.30591
2	12	32	1	0.305703	12.6342	19.2487	3.0834	0.0934718	1.28097	2.55903	2.00698	0.850216	3.54423	2.00083	39.8702	1.43692	0.171797	1.05088	1.15974
2	12	32	2	0.509112	22.0492	32.6392	5.86709	0.155891	5.13644	2.69617	1.82403	4.29182	4.07845	3.90496	22.1068	1.05377	0.14554	0.765437	0.84545
2	2	34	1	.	0.357864	0.305596	12.619	.	4.75422	1.30889	0.250207	1.3836	1.47967	4.04442	22.6812	.	1.38321	0.234307	2.83434
2	2	34	2	0.477027	0.220107	0.50257	3.05921	1.09754	0.228932	0.255577	0.814655	9.4723	0.744266	0.807632	13.2052	0.668612	0.705114	1.23999	1.37199
2	4	34	1	0.214878	0.345869	3.65481	2.77832	0.442302	0.173204	0.565539	0.584758	2.08792	1.29857	2.26782	18.6082	0.477834	0.25099	1.12886	1.1739
2	4	34	2	.	1.38053	7.86818	12.5611	0.819195	3.55571	2.73797	0.698035	3.12232	2.4977	9.5716	31.1738	1.61297	0.619851	1.08998	1.29809
2	6	34	1	0.365793	1.6605	5.24404	4.16632	0.162361	0.665599	1.29237	0.638389	1.28788	2.09629	3.29397	19.5706	0.774588	0.102385	0.85737	1.01225
2	6	34	2	0.409683	1.80855	4.18945	9.31584	0.12358	2.13978	1.14795	0.48201	3.84903	2.6267	7.99975	11.1126	1.27182	0.057858	0.64302	1.63202
2	8	34	1	0.590045	2.73814	9.77548	7.77222	0.407954	0.538817	1.76209	0.76304	1.40426	2.3845	6.22302	42.3279	0.835795	0.270477	0.653419	0.649635
2	8	34	2	0.585342	3.24804	5.78999	5.54435	0.141888	0.92908	1.09757	0.471793	2.7621	3.14578	4.71208	20.9663	0.683745	0.113671	0.763667	0.990273
2	10	34	1	0.438425	4.73089	17.0275	4.08841	0.124346	0.779142	1.99727	0.850413	2.70375	4.31851	5.04265	43.904	0.876642	0.208565	0.687004	0.697322
2	10	34	2	0.885889	5.18842	13.6337	6.1362	0.0906958	0.696778	1.82964	0.925998	3.48808	4.55627	6.20539	30.7545	1.04185	0.140962	1.02546	1.278
2	12	34	1	0.545693	12.4144	26.4836	5.49387	0.145477	1.10909	4.09301	2.57747	2.03078	4.59413	3.39711	44.5644	1.13259	0.219388	0.742805	0.786337
2	12	34	2	0.472491	13.899	32.7	4.76037	0.10803	1.12996	2.8394	1.86638	2.62372	4.70716	3.84852	45.2136	1.09498	0.22906	0.768215	0.750779
2	2	con	1	.	0.737011	1.01003	9.16609	.	2.35751	0.593089	1.60178	3.92624	2.0383	4.53053	14.5878	1.249	0.674779	1.16955	1.71101
2	2	con	2	0.465464	0.277677	0.702434	2.64196	1.15612	0.252625	0.205882	0.858734	3.81668	0.955082	0.707217	10.2029	0.550982	0.680637	1.05061	1.1641
2	4	con	1	0.268216	0.360242	2.8318	2.36114	0.475279	0.269633	0.480771	0.495745	3.67452	1.0119	1.76163	18.0077	0.514014	0.230155	1.05781	1.13776
2	4	con	2	0.0466085	0.460001	11.1047	8.4122	1.0574	0.991452	1.86238	1.20655	3.391	2.27767	7.07045	28.2656	1.71131	0.871119	0.946335	0.982202
2	6	con	1	0.696726	1.41039	5.97344	4.56297	0.247391	0.521179	1.47147	0.913728	3.32318	1.84367	2.79872	32.2773	0.77393	0.22012	0.893369	0.988387
2	6	con	2	0.797438	1.42528	8.51931	6.0058	0.233797	0.861197	1.37099	0.746757	3.8267	2.46014	4.21286	23.2039	0.769028	0.130199	0.785517	1.12003
2	8	con	1	0.413905	1.88211	6.69937	5.08279	0.544129	.	4.56063	2.24274	3.6666	1.81969	2.69627	33.6328	0.656029	0.253945	1.24799	1.13924
2	8	con	2	1.03581	4.12482	9.38309	12.914	0.188703	0.950045	8.31715	2.97367	3.27995	3.48662	4.82994	33.0221	0.920838	0.221411	0.759571	0.938935
2	10	con	1	0.208109	5.8949	15.8916	9.60304	0.160481	0.330942	9.2316	5.0572	2.07908	1.87183	2.36767	36.5351	1.25992	0.288526	0.942139	1.03558
2	10	con	2	0.559845	8.44537	24.0026	13.434	0.201261	0.72826	4.04351	2.9033	3.82649	2.42539	4.16979	40.6566	0.964674	0.335686	0.718649	0.715611
2	12	con	1	.	.	.	.	.	.	.	.	.	.	.	.	.	.	.	.
2	12	con	2	.	.	.	.	.	.	.	.	.	.	.	.	.	.	.	.
3	2	o1	1	.	0.268054	0.976947	6.22385	1.24289	1.04801	0.570322	1.03407	0.516366	0.623611	1.39676	8.15684	0.805325	1.10692	0.739065	0.767703
3	2	o1	2	0.460482	.	2.09497	.	.	.	.	.	.	.	.	.	.	.	0.771167	0.76186
3	4	o1	1	0.510281	0.794289	5.42881	5.80363	0.307181	1.49081	0.815098	0.638835	4.53725	2.3214	2.77747	17.9871	0.977529	0.195328	0.74374	1.22102
3	4	o1	2	0.791594	0.827974	7.37637	5.04902	0.297791	1.09831	0.850834	0.510648	3.25315	2.98941	3.11969	14.6303	0.880749	0.23375	0.705202	0.762121
3	6	o1	1	0.594482	2.49341	4.88673	5.56963	0.10833	1.82652	0.783689	0.356876	3.51292	2.2699	3.07737	9.83654	0.794065	0.0721718	0.668656	1.36244
3	6	o1	2	0.584682	3.92543	8.14417	6.51383	0.180408	1.80995	1.15515	0.706466	5.0189	2.74061	4.2004	16.3668	1.16137	0.149331	0.655649	0.898217
3	8	o1	1	0.665374	6.5463	11.4119	7.61453	0.12477	1.87824	1.75898	1.03151	3.81522	4.49136	5.79148	21.4481	1.45285	0.159212	0.665049	0.92811
3	8	o1	2	0.0742898	0.568388	0.326111	.	.	.	0.727696	.	5.06075	.	.	2.77361	1.43613	0.0646899	0.0731695	0.145549
3	10	o1	1	0.577907	7.01844	15.9331	5.48919	0.109832	2.1331	2.33703	1.08474	4.14807	4.03346	3.91054	21.6459	1.43834	0.143657	0.903569	1.22922
3	10	o1	2	0.00144894	1.84636	20.858	0.865491	0.0495778	.	.	0.278488	11.735	0.650623	0.374751	1.81637	0.131502	0.372774	0.699507	0.647363
3	12	o1	1	0.0359245	3.94347	10.7457	3.62462	0.0331414	15.0252	4.42554	0.113836	2.9265	1.33299	3.5408	.	2.16837	0.708785	0.353336	1.7718
3	12	o1	2	0.0410093	15.4275	26.4312	5.57245	0.134432	5.32779	2.69931	2.01294	18.3371	2.33578	1.99794	10.1375	2.57049	0.373612	1.2179	1.4438
3	2	o2	1	0.148219	0.124355	.	.	0.0840871	.	1.5396	.	3.16244	.	.	.	.	.	.	.
3	2	o2	2	0.573813	0.317171	0.890986	7.19564	1.24646	0.341504	0.917055	1.30159	23.9147	1.73247	1.60027	15.4061	0.754099	0.863331	0.798266	0.822508
3	4	o2	1	0.593668	0.923784	3.84795	4.98511	0.308854	0.998898	1.08994	0.727577	17.8382	2.34504	2.53284	12.893	0.931957	0.213214	0.734822	1.20396
3	4	o2	2	0.429079	0.643386	6.64626	3.69678	0.214999	1.32542	0.586921	0.478607	3.50281	1.15852	3.74481	6.4473	0.615968	0.226697	0.712686	0.760722
3	6	o2	1	0.45172	1.38297	.	5.11675	0.272502	0.897749	1.20647	0.353034	18.0463	1.32156	3.18146	20.7341	0.537431	0.282049	0.588839	0.611491
3	6	o2	2	0.50562	1.92977	3.58416	5.07221	0.0850036	2.1488	0.8591	0.286125	4.23668	2.71449	3.49312	7.166	0.570245	0.0742748	0.664048	1.53739
3	8	o2	1	0.74389	6.97867	13.1744	7.79904	0.157906	2.84464	2.70804	1.13065	8.12182	4.33686	4.86065	15.823	0.832141	0.215879	0.646952	0.746272
3	8	o2	2	0.0415266	4.70101	9.5796	3.41518	0.169192	1.4254	1.94896	0.810998	16.1966	3.28607	5.05353	8.31414	1.07394	0.249646	1.12394	1.27275
3	10	o2	1	0.0768248	4.15025	20.3722	2.58389	0.0941352	0.820576	1.97895	0.315387	3.14453	.	2.39903	.	0.326999	0.297433	0.719222	0.728433
3	10	o2	2	0.261004	8.18115	20.2319	4.48797	0.151045	1.40941	3.24955	1.25739	11.0464	2.93055	5.1162	13.1996	1.51048	0.263799	0.929467	1.00715
3	12	o2	1	0.0758167	2.83836	6.21728	1.87394	0.0191174	6.36603	3.8217	0.109465	5.25559	0.976905	3.21713	.	1.15775	0.340324	0.229742	1.3805
3	12	o2	2	0.191136	11.5188	22.6194	4.94224	0.115096	3.04646	3.60704	1.35293	3.8566	2.15833	2.69198	15.8092	2.0826	0.199967	1.22118	1.40335
3	2	o4	1	0.166968	0.601851	0.182903	2.63372	0.129012	.	0.999405	.	4.11159	.	.	.	.	1.02901	0.142314	0.786805
3	2	o4	2	0.264517	0.00370085	0.357937	7.29523	0.692435	0.117446	0.119355	0.205301	4.16614	0.382536	0.491337	3.63084	0.249721	0.457049	0.678567	0.808172
3	4	o4	1	0.646265	0.911886	6.59973	6.91658	0.341351	2.94855	1.56609	0.684026	4.13269	2.80904	3.51412	15.7296	0.991662	0.20917	0.757491	0.906405
3	4	o4	2	0.106168	0.114029	4.23732	1.39123	0.295489	0.10995	0.454907	.	4.12914	0.229079	2.95623	6.31447	0.141592	0.285141	0.668413	0.69608
3	6	o4	1	0.178271	0.567739	.	1.79588	0.147308	0.156004	0.495804	0.211888	5.11499	0.876291	1.51807	.	0.175515	0.20199	0.618026	0.696777
3	6	o4	2	0.203776	1.5959	3.55899	3.12784	0.114418	2.96764	1.51533	0.499765	8.01206	2.0767	4.82198	.	0.602077	0.163833	1.00467	1.45629
3	8	o4	1	0.609317	5.77515	9.20156	3.94334	0.130596	2.76496	2.31959	0.783718	.	4.32908	4.40465	15.7747	0.847841	0.179935	0.727876	0.866404
3	8	o4	2	0.446628	6.32038	2.93964	7.70901	0.0679029	.	2.29135	0.789563	6.49903	6.5645	8.10981	5.01919	1.31659	0.105454	0.626292	2.73605
3	10	o4	1	0.369399	3.49163	17.0864	1.87072	0.112329	0.723937	2.96518	0.38237	6.65964	3.05049	3.06282	19.0213	0.446469	0.264627	0.65711	0.698698
3	10	o4	2	0.462295	5.6977	13.743	7.2703	0.0926551	.	2.30426	1.36611	4.26325	1.64326	7.02795	7.50122	0.897557	0.191238	1.32726	1.72962
3	12	o4	1	0.260361	38.2892	56.4721	6.55666	0.201814	5.99435	4.23808	2.4398	5.47276	5.15041	6.35387	13.7291	2.28142	0.224303	0.903256	1.00283
3	12	o4	2	0.0185125	12.8434	48.5393	4.6459	0.110341	6.37389	.	0.763181	4.5747	3.77681	6.225	13.9322	2.74801	0.416659	1.38735	1.46373
3	2	31	1	0.722419	0.295728	0.601646	5.66544	0.737615	0.917345	0.60716	1.30896	12.3358	1.27369	1.10886	13.4974	0.924164	0.659259	0.895241	1.18713
3	2	31	2	0.771803	0.494324	0.944729	8.92215	0.783888	1.90604	0.911802	1.27293	5.92398	2.89532	1.48753	17.4078	1.4289	0.613588	0.784883	0.981244
3	4	31	1	0.548469	0.723479	4.27554	6.60416	0.197724	2.07711	0.867874	0.469648	1.58836	2.32392	2.47229	12.5934	1.01736	0.144986	0.727568	1.49379
3	4	31	2	0.235999	0.843116	10.2009	3.78454	0.503919	0.988858	1.04276	0.472121	4.41667	1.261	3.7188	5.54611	1.07791	0.355591	0.76731	0.808909
3	6	31	1	0.702587	4.11922	.	4.6972	0.270412	0.901579	0.961123	0.415662	8.89826	1.06497	3.14107	13.2351	0.635381	0.324257	0.59069	0.625856
3	6	31	2	0.351491	12.5198	11.347	18.1324	0.575967	.	3.77718	1.76399	1.59315	5.60488	24.9418	12.6343	.	0.259777	0.637876	1.14312
3	8	31	1	0.930068	6.10172	13.3084	5.00193	0.169724	1.83175	1.76613	.	3.48917	3.05002	3.70224	23.5212	1.02821	0.187188	0.654059	0.734408
3	8	31	2	0.4365	6.42559	16.4651	6.59325	0.206164	1.64021	1.90066	1.13173	0.881913	2.26828	3.09588	28.3007	0.911238	0.377721	0.690425	0.700929
3	10	31	1	0.368799	8.91975	24.6585	4.84462	0.193953	1.89185	2.85534	1.51778	1.08038	2.07763	5.06387	21.3027	1.13253	0.316211	0.670093	0.683003
3	10	31	2	0.0319403	12.6268	41.4042	7.17506	0.252151	4.02186	5.53106	2.2554	1.6922	5.53348	8.01194	12.222	2.6591	0.444607	1.01362	1.11486
3	12	31	1	0.0439347	13.3572	67.4999	3.68534	.	.	.	.	1.64593	.	.	.	0.265007	0.604468	0.712931	0.688467
3	12	31	2	0.0294174	36.6844	64.8983	11.2904	0.280809	15.3941	5.72891	3.18302	0.84271	6.51973	6.70792	17.1148	4.86981	0.804814	1.05621	1.07727
3	2	32	1	0.37124	0.308753	0.508695	6.97341	0.589661	1.37059	0.415988	1.27373	1.84705	1.13597	1.80945	4.14906	1.65169	0.526946	0.899677	1.7752
3	2	32	2	0.519598	0.0480706	0.484622	5.15303	1.01223	.	0.345208	0.419204	1.68277	0.491051	0.804197	9.48269	0.178577	0.452323	0.617791	0.831667
3	4	32	1	0.533079	0.802813	5.13272	7.26745	0.218765	0.840466	0.710352	0.489324	2.20227	2.76257	4.74155	8.99321	1.2894	0.124571	0.499286	1.51011
3	4	32	2	0.59059	0.885047	5.17207	5.40827	0.222589	1.35537	0.616378	0.553491	2.23929	2.57939	4.06812	10.0509	0.861725	0.172008	0.645072	1.1953
3	6	32	1	0.44678	4.14125	9.70831	5.97575	0.334785	0.980535	0.883365	0.678208	2.3448	2.06886	4.11739	17.3882	0.82647	0.209044	0.647852	0.706955
3	6	32	2	0.492547	3.8142	4.97652	8.1429	0.0724855	3.25739	0.983692	0.458925	1.90721	3.63577	6.88307	8.82411	1.3832	0.080732	0.413495	1.93486
3	8	32	1	0.441595	4.92849	11.4657	4.81176	0.199081	1.83335	1.81967	0.848293	2.8407	1.5869	3.59186	16.2074	0.546588	0.244397	0.670521	0.686709
3	8	32	2	0.507182	5.13322	11.0697	5.65856	0.167694	1.2681	1.65533	0.884745	1.02898	2.59837	3.49768	23.4491	0.870333	0.238785	0.726238	0.770737
3	10	32	1	0.0818524	0.849258	25.4705	1.12583	0.0653276	0.0846856	1.30031	0.10088	2.15985	0.586079	0.706339	11.7482	0.0817495	0.311387	0.642891	0.703931
3	10	32	2	0.0300967	2.00526	6.89673	3.97566	0.050532	2.97756	3.89413	0.166408	2.00046	1.76131	4.43106	4.79598	2.17399	0.328884	0.533177	1.97201
3	12	32	1	0.422236	22.8236	44.8967	5.84331	0.128326	10.6115	3.56151	1.36045	3.15058	4.0106	4.55314	28.498	1.19628	0.263022	0.692942	0.668387
3	12	32	2	0.259125	17.4242	33.5222	4.28978	0.105918	2.65648	2.19467	1.13087	2.49686	3.54312	2.49681	29.1986	1.53152	0.238754	1.00527	0.83312
3	2	34	1	0.774395	0.71276	0.548536	9.73992	0.501395	.	0.737794	1.26187	1.52784	2.13709	4.82977	7.95103	2.152	0.424719	0.599554	2.77687
3	2	34	2	0.471358	0.0444649	1.07486	3.42905	0.936706	0.347484	0.80941	0.687017	5.02185	1.04203	2.15356	14.1943	0.417476	1.03915	0.855766	0.830694
3	4	34	1	0.245102	0.228873	6.66396	3.63881	0.457819	0.973949	0.571435	0.305972	2.75552	1.46941	2.83588	11.7323	0.429695	0.260738	0.673003	0.699752
3	4	34	2	0.589982	1.41875	3.92203	5.92107	0.214508	3.13243	0.882762	0.522347	3.31117	2.21102	6.20682	10.2307	0.719426	0.170058	0.772741	1.28799
3	6	34	1	0.945992	4.89598	7.83845	5.59886	0.264947	3.01229	1.43983	0.506091	2.61633	3.31466	3.79706	19.6777	0.82771	0.190784	0.68253	0.74521
3	6	34	2	0.654091	3.28265	11.512	6.6593	0.208486	1.33417	1.35375	0.528439	3.19033	2.11553	4.29617	18.491	0.748245	0.168673	0.663664	0.728213
3	8	34	1	0.166579	2.43428	3.25624	2.64482	0.0914122	1.7259	1.01777	0.413106	2.13154	2.16237	4.26074	5.39346	0.568152	0.09353	0.997475	1.24392
3	8	34	2	0.524062	4.8752	7.79372	6.18689	0.152605	2.09424	2.19616	0.631995	4.20758	3.6862	4.44302	13.3858	0.930651	0.164187	0.766146	1.11953
3	10	34	1	0.277812	1.82009	22.4313	1.92078	0.0597058	0.272548	2.05901	.	2.95285	1.59415	2.36077	.	0.174564	0.22634	0.671468	0.744386
3	10	34	2	0.0191921	0.933152	3.2087	1.7972	0.0291653	.	3.74644	.	7.13094	1.18998	2.7027	4.78924	1.47358	0.292933	0.221469	1.35886
3	12	34	1	0.345424	22.6388	42.5965	4.92399	0.122617	3.08041	2.48982	1.06281	2.82642	2.97049	3.3576	.	1.70171	0.237614	0.807735	0.709747
3	12	34	2	0.0307689	14.9472	35.0075	11.5766	0.220991	10.2613	8.40611	2.10403	4.72316	4.74779	7.13969	23.2358	5.23404	0.47968	1.15586	1.3063
3	2	con	1	0.556852	0.517924	1.0256	6.27564	1.03449	0.927031	0.603187	1.56864	4.97266	1.68028	1.65418	13.9985	1.09429	0.765337	1.0358	0.883408
3	2	con	2	0.592274	0.276022	0.701303	4.60603	0.739341	1.38729	0.504279	0.885711	2.97773	1.65014	2.62987	8.42108	1.15049	0.608913	0.842648	0.97421
3	4	con	1	0.532598	0.389352	7.66165	4.40874	0.479531	0.83451	0.641388	0.511025	5.69725	1.61411	1.82391	14.7745	0.520155	0.19324	0.652814	0.686156
3	4	con	2	0.901689	3.3476	5.40453	13.145	0.41669	21.6097	1.83064	0.961229	4.89623	4.87541	11.4675	12.7886	3.00135	0.184135	0.663181	1.5451
3	6	con	1	0.563974	3.0051	7.79114	5.45155	0.209556	1.19896	1.12705	0.779563	4.26324	2.00782	2.0173	19.2099	0.695526	0.168514	0.701844	0.800989
3	6	con	2	0.150983	2.48433	6.11304	4.6874	0.249242	0.717178	1.39741	0.884918	9.45756	1.19809	2.57405	18.797	1.22018	0.195208	0.769961	0.947439
3	8	con	1	0.252759	5.82553	14.1515	5.06069	0.211613	1.92419	2.02369	1.29398	3.27073	2.03179	4.1672	9.9001	1.11285	0.403604	0.742214	0.877481
3	8	con	2	0.452662	6.7028	12.9095	6.09248	0.186808	2.00751	1.80574	1.30956	4.17205	2.34258	3.37702	26.2141	0.943602	0.338564	0.726451	0.839253
3	10	con	1	0.246015	6.95399	46.395	3.01021	0.141088	.	.	0.764196	3.16042	1.57324	2.13112	19.7088	0.704205	0.417107	0.617993	0.641581
3	10	con	2	.	2.19612	7.85628	5.43028	0.0579005	6.05308	7.61774	0.333872	3.42846	2.0598	5.02702	13.2602	2.56123	0.524607	0.917945	2.06558
3	12	con	1	.	32.0053	56.3907	11.3457	0.128065	9.72649	3.70666	1.82506	5.05191	2.94641	2.65261	28.3667	2.04815	0.529223	0.873551	0.698275
3	12	con	2	.	27.7478	52.2714	15.4585	0.227951	16.9724	4.97735	3.34702	3.16012	2.2192	2.30875	28.1794	1.96088	0.812029	0.729903	0.728942
